# Supplementary material for: Structural analysis and catalytic activity of tetranuclear metal carboxylate clusters with a [KZn3(μ3-OH)(OOCCPh3)6] or [Zn4(μ4-O)(OOCCPh3)6] central motif
Source: Royal Society of Chemistry journal article supplement (doi:10.1039/d0nj02540b), 2020-01-01
Supplement: d0nj02540b1.pdf [file d0nj02540b1.pdf]

## Supporting information for

### **Structural analysis and catalytic activity of tetranuclear metal carboxylate clusters with [KZn<sub>3</sub>(μ<sub>3</sub>-OH)(OOCPh<sub>3</sub>)<sub>6</sub>] or [Zn<sub>4</sub>(μ<sub>4</sub>-O)(OOCPh<sub>3</sub>)<sub>6</sub>] central motif**

Rafał Petrus<sup>\*a</sup>, Józef Utko<sup>b</sup>, Piotr Sobota<sup>\*c</sup>

<sup>a</sup> Faculty of Chemistry, Wrocław University of Science and Technology, 23 Smoluchowskiego, 50-370  
Wrocław, Poland

<sup>b</sup> Faculty of Chemistry, University of Wrocław, 14 F. Joliot-Curie, 50-383 Wrocław, Poland

<sup>c</sup> Łukasiewicz Research Network – PORT Polish Center For Technology Development, 147 Stabłowicka, 54-066  
Wrocław, Poland

Corresponding author:

Dr. Rafał Petrus, [rafal.petrus@pwr.edu.pl](mailto:rafal.petrus@pwr.edu.pl)

Prof. Dr. Piotr Sobota, [piotr.sobota@port.org.pl](mailto:piotr.sobota@port.org.pl)

## Contents

|                                           |    |
|-------------------------------------------|----|
| X-Ray Crystallography.....                | S2 |
| IR spectra of <b>1-3</b> .....            | S4 |
| PXRD study of <b>1</b> and <b>3</b> ..... | S6 |

### Crystallographic Data for Compounds 1-3.

**Table S1.** Crystal and data collection parameters for compounds 1-3.

| Crystal                                          | 1·4CH <sub>3</sub> CN·0.2C <sub>6</sub> H <sub>14</sub>                                | 1·2·3.58CH <sub>3</sub> CN·0.21C <sub>6</sub> H <sub>14</sub>                                                 | 3·5CH <sub>3</sub> CN                                                           |
|--------------------------------------------------|----------------------------------------------------------------------------------------|---------------------------------------------------------------------------------------------------------------|---------------------------------------------------------------------------------|
| Chemical formula                                 | C <sub>131.2</sub> H <sub>108.8</sub> N <sub>5</sub> O <sub>13</sub> Zn <sub>3</sub> K | C <sub>130.42</sub> H <sub>107.6</sub> N <sub>4.58</sub> O <sub>13</sub> Zn <sub>3.08</sub> K <sub>0.92</sub> | C <sub>124</sub> H <sub>96</sub> N <sub>2</sub> O <sub>13</sub> Zn <sub>4</sub> |
| Formula Mass                                     | 2198.71                                                                                | 2184.33                                                                                                       | 2288.86                                                                         |
| Crystal system                                   | Triclinic                                                                              | Triclinic                                                                                                     | Triclinic                                                                       |
| Space group                                      | <i>P</i> $\bar{1}$                                                                     | <i>P</i> $\bar{1}$                                                                                            | <i>P</i> $\bar{1}$                                                              |
| <i>a</i> /Å                                      | 14.302(4)                                                                              | 14.301(4)                                                                                                     | 13.610 (3)                                                                      |
| <i>b</i> /Å                                      | 15.362(5)                                                                              | 15.348 (4)                                                                                                    | 15.338 (4)                                                                      |
| <i>c</i> /Å                                      | 27.872 (9)                                                                             | 27.869 (8)                                                                                                    | 29.649 (8)                                                                      |
| $\alpha$ /°                                      | 74.68 (3)                                                                              | 74.64 (3)                                                                                                     | 92.10 (3)                                                                       |
| $\beta$ /°                                       | 84.79 (3)                                                                              | 84.79 (3)                                                                                                     | 97.87 (3)                                                                       |
| $\gamma$ /°                                      | 66.28 (3)                                                                              | 66.31 (3)                                                                                                     | 112.25 (3)                                                                      |
| Unit cell volume/Å <sup>3</sup>                  | 5406 (3)                                                                               | 5401 (3)                                                                                                      | 5648(3)                                                                         |
| Temperature/K                                    | 100(2)                                                                                 | 100(2)                                                                                                        | 100(2)                                                                          |
| <i>Z</i>                                         | 2                                                                                      | 2                                                                                                             | 2                                                                               |
| Radiation type                                   | MoK $\alpha$                                                                           | MoK $\alpha$                                                                                                  | MoK $\alpha$                                                                    |
| Absorption coefficient, $\mu$ /mm <sup>-1</sup>  | 0.767                                                                                  | 0.781                                                                                                         | 0.907                                                                           |
| No. of reflections measured                      | 60695                                                                                  | 71595                                                                                                         | 49124                                                                           |
| No. of independent reflections                   | 27833                                                                                  | 23571                                                                                                         | 24365                                                                           |
| No. of observed reflections ( $I > 2\sigma(I)$ ) | 22907                                                                                  | 19892                                                                                                         | 14784                                                                           |
| $R_{int}$                                        | 0.0282                                                                                 | 0.0297                                                                                                        | 0.0525                                                                          |
| Final $R_I$ values ( $I > 2\sigma(I)$ )          | 0.0393                                                                                 | 0.0404                                                                                                        | 0.0539                                                                          |
| Final $wR(F^2)$ values ( $I > 2\sigma(I)$ )      | 0.1134                                                                                 | 0.1046                                                                                                        | 0.1167                                                                          |
| Final $R_I$ values (all data)                    | 0.0476                                                                                 | 0.0515                                                                                                        | 0.0998                                                                          |
| Final $wR(F^2)$ values (all data)                | 0.1166                                                                                 | 0.1112                                                                                                        | 0.1279                                                                          |
| Goodness of fit on $F^2$                         | 1.104                                                                                  | 1.037                                                                                                         | 0.927                                                                           |
| $\Delta\rho_{max}/e\text{\AA}^{-3}$              | 1.03                                                                                   | 1.55                                                                                                          | 0.72                                                                            |
| $\Delta\rho_{min}/e\text{\AA}^{-3}$              | -0.75                                                                                  | -1.03                                                                                                         | -0.82                                                                           |

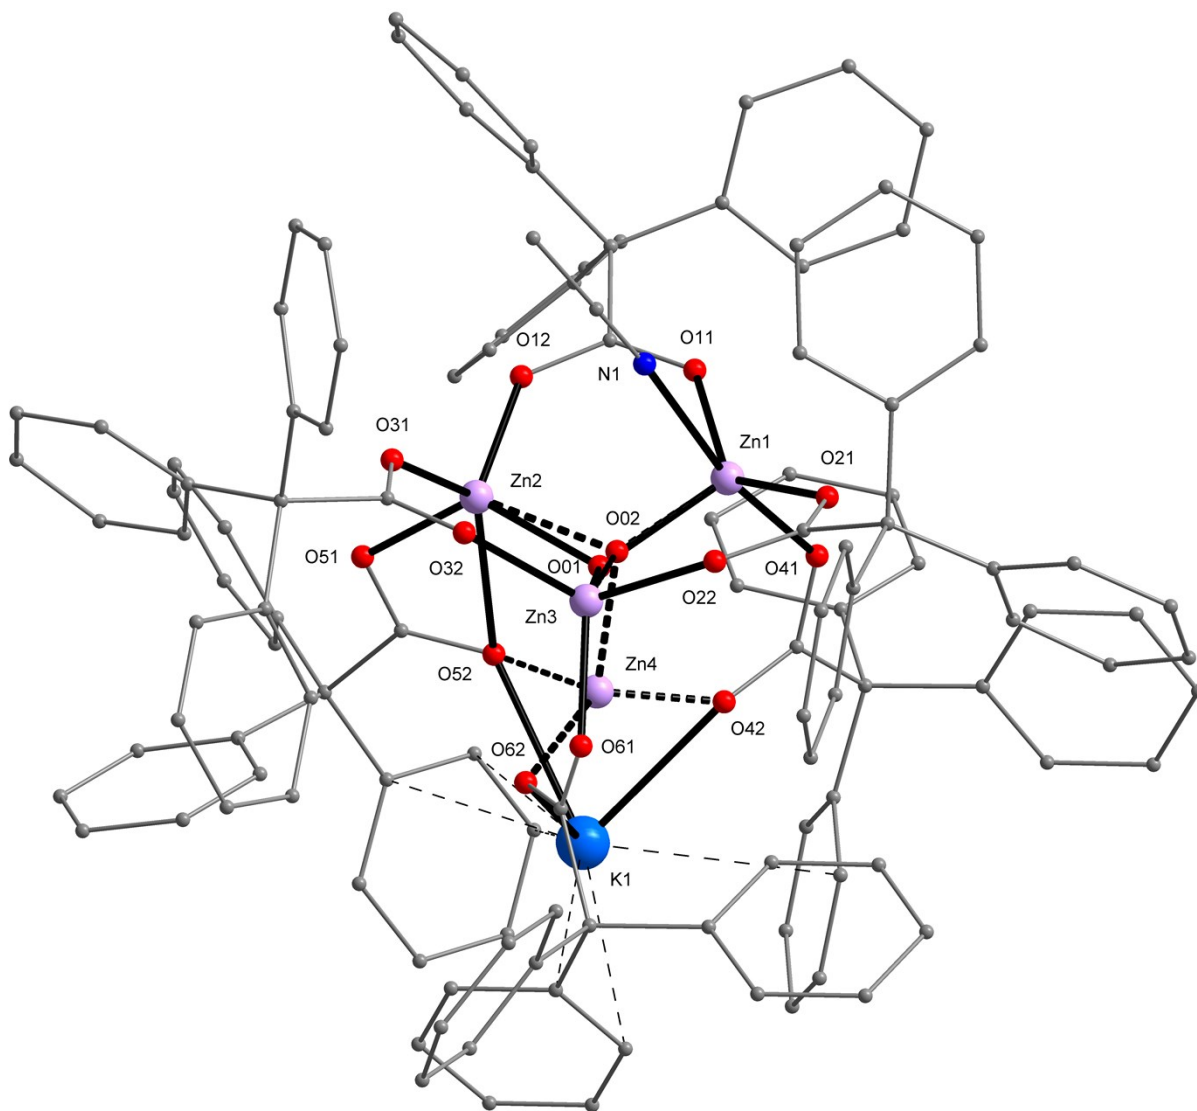

**Figure S1.** Molecular structures of  $[\text{KZn}_3(\mu_3\text{-OH})(\text{Ph}_3\text{CCOO})_6(\text{MeCN})]_{0.92} \cdot [\text{Zn}_4(\mu_4\text{-O})(\text{Ph}_3\text{CCOO})_6(\text{MeCN})_2]_{0.08} \cdot 3.58\text{MeCN} \cdot 0.21\text{C}_6\text{H}_{14}$ , ( $\mathbf{1} \cdot 3.58\text{MeCN} \cdot 0.21\text{C}_6\text{H}_{14}$ ). Hydrogen atoms and solvent molecules are omitted for clarity.

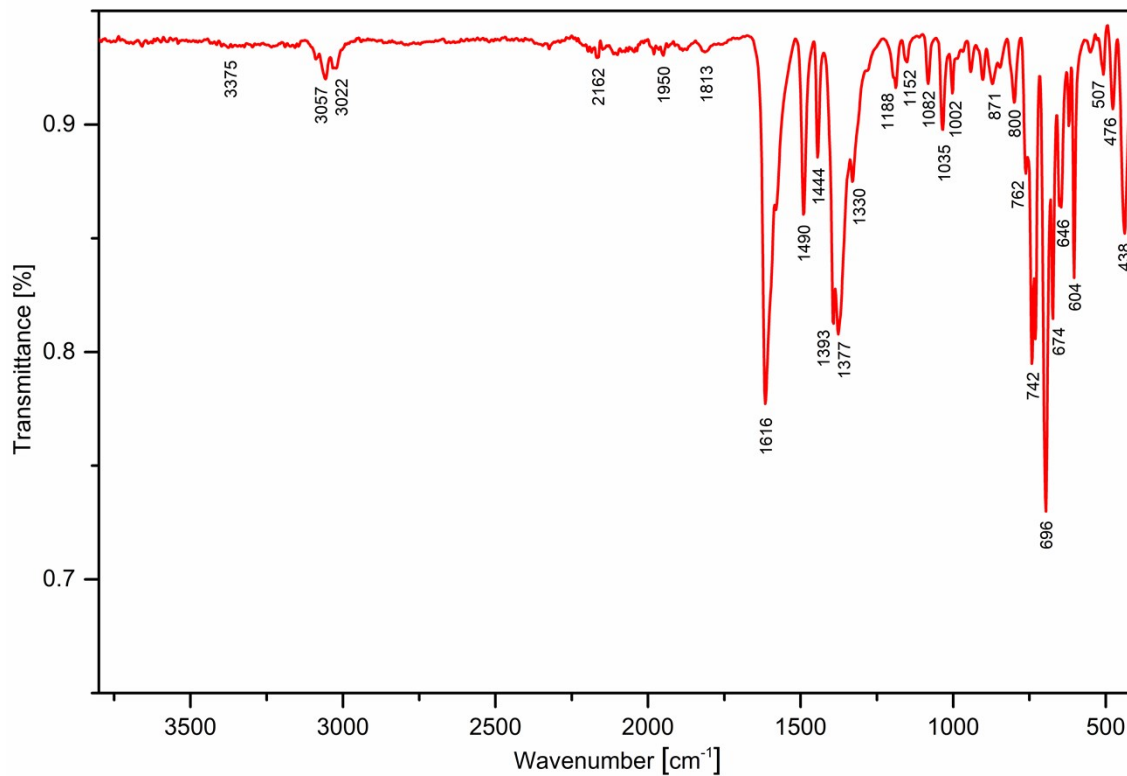

**Figure S2.** FTIR-ATR spectra of **1**.

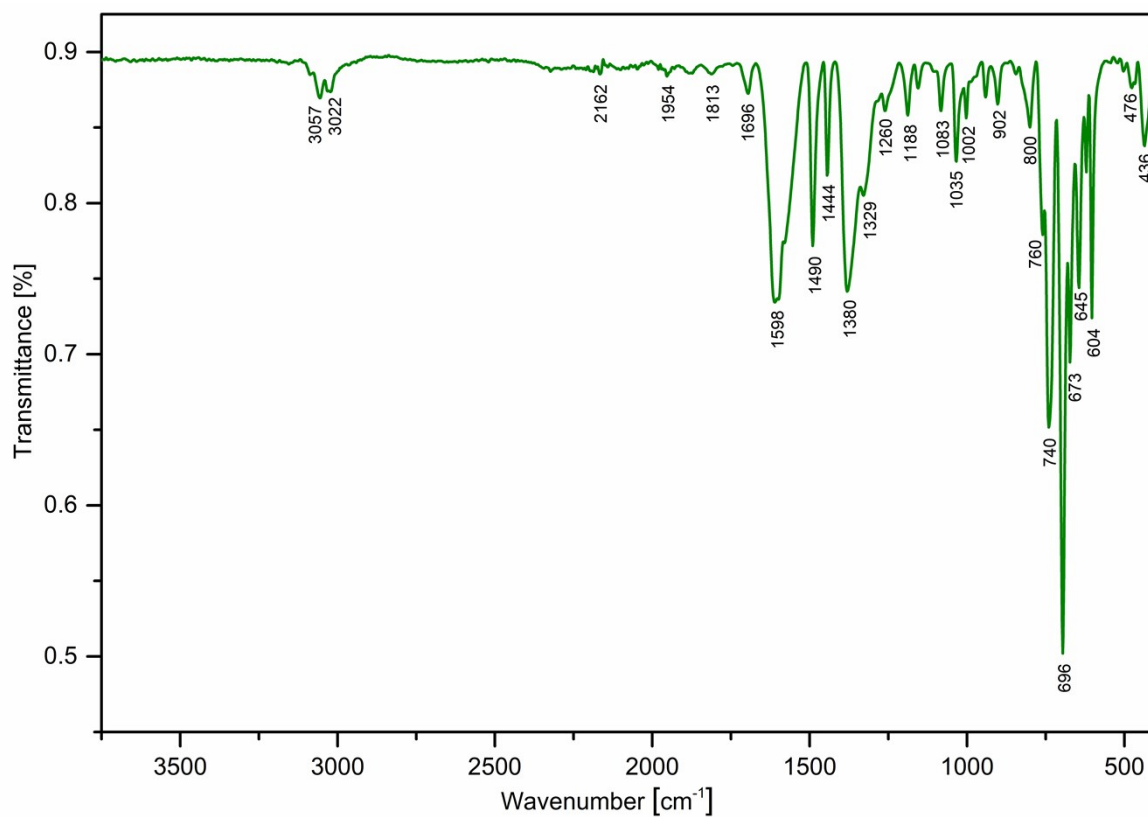

**Figure S3.** FTIR-ATR spectra of **1·2**.

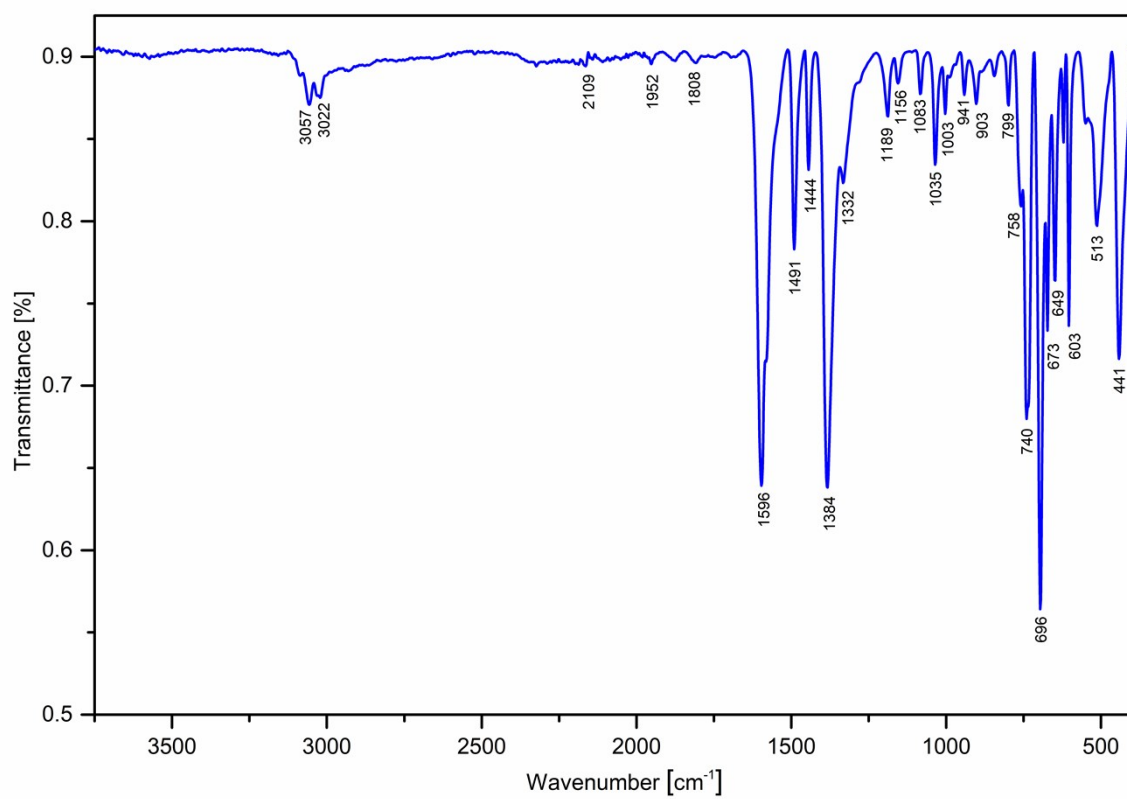

**Figure S4.** FTIR-ATR spectra of **3**.

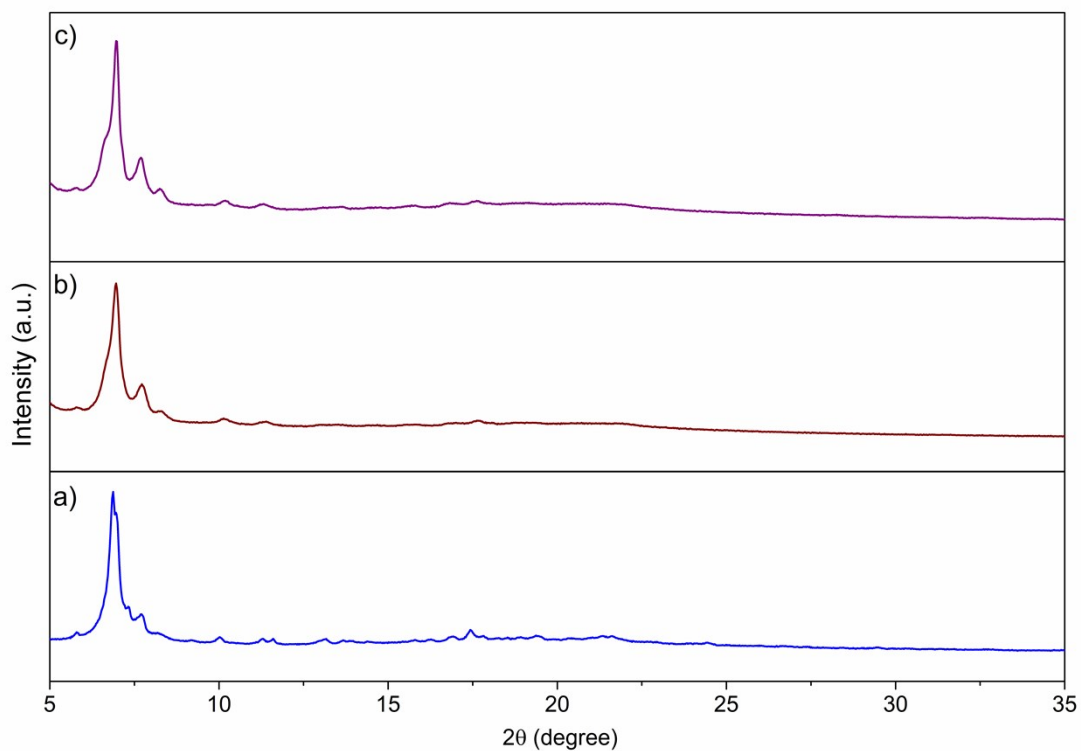

**Figure S5.** Comparison of PXRD patterns of **3** measured at 25 °C for the ground crystals (a), crystals without grounding and crystalline precipitate isolated from the reaction (c).

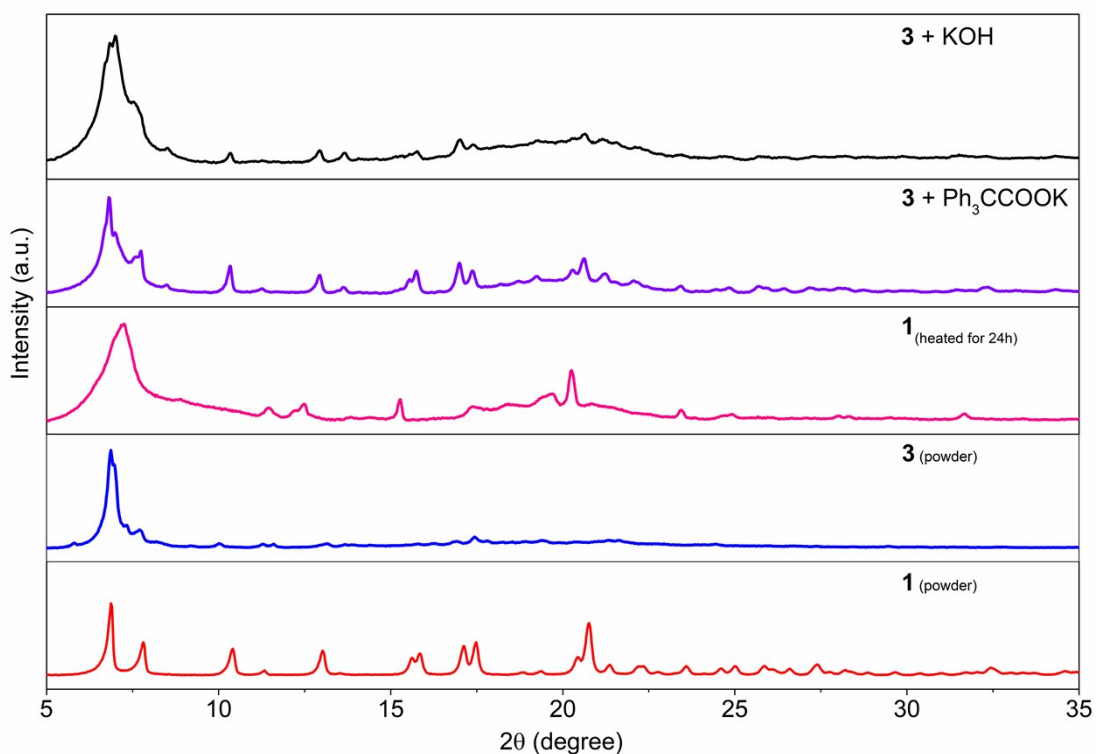

**Figure S6.** Comparison of PXRD patterns of **1** and **3** together with patterns of crystalline materials obtained by the heating of **1** for 24h in CH<sub>3</sub>CN solution (pink), and reaction of **3** with Ph<sub>3</sub>CCOOK (violet) or KOH (black).
